# Supplementary material for: Complexity of Resting Cortical Activity Predicts Neurophysiological Responses to Theta- Burst Stimulation but Fails to Generalize: A Rigorous Machine-Learning Approach
Source: Research Square preprint supplement (doi:10.21203/rs.3.rs-7643216/v1), 2025-09-24
Supplement: Supplementary file 1 [file 7f77c7ce3152d34d873f389e.docx]

# Complexity of Resting Cortical Activity Predicts Neurophysiological Responses to Theta-Burst Stimulation but Fails to Generalize: A Rigorous Machine-Learning Approach.

# Supplementary Methods & Materials

## Methods

### MRI Scans

Before the TMS sessions, T1-weighted anatomical MRI scans for neuronavigation during the TMS sessions were taken from participants. The full details of the experimental design for the Cohort 1 can be found in [1].

### Motor Hotspot

The following text is copied from [1]. “At the beginning of each session, the motor hotspot was determined over the hand region of the left motor cortex for eliciting motor-evoked potentials in the right FDI muscle. The hotspot was defined as the region where single-pulse TMS elicited consistent MEPs in the FDI muscle. Following International Federation of Clinical Neurophysiology (IFCN) guidelines, resting motor threshold (RMT) was determined on the FDI hotspot as the minimum stimulation intensity eliciting at least five MEPs (≥50 mV) out of ten pulses in the relaxed FDI using monophasic (posterior-anterior in the brain) current waveforms. In compliance with the IFCN safety recommendations, participants were asked to wear earplugs during hotspot and RMT trials to protect their hearing, and to minimize external noise. Active motor threshold was determined by again asking participants to flex their right index finger to engage the FDI muscle to approximately 20% of maximum voluntary contraction (MVC) and determined at the lowest intensity to produce MEPs of ≥200mv at least 5/10 times. TMS was administered with a thin layer of foam placed under the coil to minimize somatosensory contributions to TEPs. To minimize auditory evoked potentials related to the TMS coil click, auditory white noise masking was used throughout the TMS stimulation.”

### TBS Procedures

The following text is copied from [1]. “Participants were randomly assigned to receive either sham using either the cTBS or iTBS pattern, which was maintained across both sham visits. Sham cTBS and iTBS protocols were administered on the motor hot spot from the placebo side of the Cool-B65 A/P coil with a 3D printed 3 cm spacer additionally attached to the placebo side (MagVenture A/S, Farum, Denmark). Both active and sham-TBS protocols also included delivery of weak current pulses (between 2 and 4 mA and proportional to the intensity of actual TMS pulse) via surface electrodes (Ambu Neuroline 715 12/Pouch) placed approximately 1 cm below the inion bump and synchronized with the TBS trains to produce scalp sensations during both active and sham TBS conditions. This was done with the intention of blinding participants as to what kind of stimulation they were receiving when the direct somatosensory sensations of active TBS were not present during the sham stimulation.”

### rsEEG Preprocessing

In both data sets, rsEEG were first down-sampled to 250 Hz. In order, notch (band stop frequency 57-63 Hz, 4th total order forward-backward Butterworth) and high-pass (1 Hz high pass frequency, 4th total order forward-backward Butterworth) filters were applied. EEG channels contaminated by artifacts were manually identified and removed (Number of rejected channels reported as average ± SD. Cohort 1: 0.16 ± 0.44, Cohort 2: 0.64 ± 0.90. Number of remaining channels reported as average ± SD. Cohort 1: 58.84 ± 0.44, Cohort 2: 58.36 ± 0.90). A copy of continuous rsEEG at this step (after channel rejection but before epoch rejection) was saved for later. Then, continuous rsEEG was divided into 10-second epochs, visually inspected and bad epochs were manually recorded and removed. Number of rejected epochs are reported as average ± SD. Cohort 1: 1.70 ± 2.41, Cohort 2: 3.71 ± 2.61. Number of remaining epochs are reported as average ± SD. Cohort 1: 13.41 ± 2.60, Cohort 2: 12.77 ± 3.26. After that, EEG epochs were re-referenced to common average reference. Fast independent component analysis (fICA v2.5, http://research.ics.aalto.fi/ica/fastica/) EEGLAB plugin was used to compute independent components (ICs). Non-brain ICs that represented blink/eye movement, electromyographic activity, single electrode noise, or cardiac beats artifacts were manually identified based on their power spectrum, amplitude, scalp topography, and time course using TMS-EEG Signal Analyser (TESA v1.1.1, http://nigelrogasch.github.io/TESA) EEGLAB toolbox (Cohort 1: Total number of analyzed ICs – 59, average ±SD rejected ICs = 28.38 ± 5.92; total average ± SD remaining ICs = 29.73 ± 6.56. Cohort 2: Total number of analyzed ICs – 59, average ± SD rejected ICs = 28.71 ± 5.11; total average ± SD remaining ICs = 28.67 ± 4.96). The ICA weights obtained were then applied to continuous rsEEG saved before. Channels rejected during the previous steps were interpolated using spherical interpolation. Next, continuous rsEEG was band-pass filtered with [1, 40] Hz as the passband edge frequencies (4th total order forward-backward Butterworth). Finally, the continuous rsEEG was divided into 10-second epochs and epochs rejected in previous step were also rejected in this step.

### MEP Preprocessing

For both studies, monopolar EMG data from the belly and tendon of the right hand’s first dorsal interosseous (FDI) muscle was acquired with surface electrode pairs (made of Ag-AgCl) with the ground electrode located on the right ulnar styloid. These EMG data was digitized at a sampling rate of 5 kHz by the amplifier system (BrainVision actiCHamp system, Brain Products GmbH) and BrainVision Recorder software (Software Version 1.20.0601, Brain Products GmbH). Epochs were extracted with a 150ms window extending 50ms before and 100ms after the spTMS.

EMG data was preprocessed offline using custom MATLAB script (MATLAB R2022b, Math-Works Inc., USA). EMG data was first band-pass filtered (10-2000 Hz). Then, for each epoch, baseline correction was applied (by subtracting the mean of -50 to -5 ms window relative to spTMS from the entire EMG epoch). Next, root mean square (RMS) of EMG signal was computed using -20 to 13 ms window relative to spTMS (excluding -2 to 2 ms period to exclude any TMS artifacts). Epochs with RMS 2.5 standard deviation above the mean RMS of the entire block were excluded from further analysis. The peak-to-peak amplitude of MEP was computed for the remaining epochs using the 18 to 50 ms window.

### TMS-EEG Preprocessing

Users can refer to [1] for the full details of TMS-EEG preprocessing. TMS-EEG data was preprocessed offline using custom MATLAB script (MATLAB R2017b and MATLAB R2021a, Math-Works Inc., USA). All trials were segmented into 3000 ms epochs, extending 1000 ms before and 2000 ms after spTMS. Baseline correction was applied as followed: the mean of the -900 to -100 ms window (relative to spTMS) was subtracted from the entire epoch in each channel. Next, epochs were visually inspected and noisy channels identified and removed (number of rejected channels reported as average ± SD. Cohort 1: 2.5 ± 1.5, range 0-4 out of 63, Cohort 2: 3.9 ± 3.3, range 0-14 out of 63). Zero-padding was applied to the -2 to 14 ms window to remove early TMS pulse artifact. Thereafter, voltage statistics including amplitude (≥100 μV), kurtosis (≥3) and joint probability (single-channel-based threshold ≥ 3.5 SD; all-channel-based threshold ≥ 5 SD) were computed to automatically identify noisy epochs before a manual review for removing noisy epochs. (Number of rejected epochs are reported as average ± SD. Cohort 1: 18 ± 6, range 2-39 out of 120, Cohort 2: 22.7 ± 16.8, range 0-75 out of 150). An initial round of fast independent component analysis (fICA) was performed for blind-source segregation of TMS-EEG into components. Components were visually reviewed and identified for early TMS evoked high amplitude electrode and EMG artifacts (Number of components rejected are reported as average ± SD. Cohort 1: 1 ± 1, range 0-3 out of 63, Cohort 2: 1 ± 0.4, range 0-2 out of 63). The remaining components were mapped back to sensor space, its zero-padded time window linearly interpolated (-2 to 14 ms). In order, the band pass filter (forward-backward 4th total order Butterworth filter from 1 to 100 Hz) and notch filter (forward-backward 4th total order Butterworth filter between 57 and 63 Hz) were applied. TMS-EEG were referenced to common-average reference. 2nd round of fICA was run to manually identify and remove noisy components that include eye movements and blinking, muscle artifact (EMG), single electrode noise, TMS evoked muscle and cardiac beats (EKG). (Number of components rejected are reported as average ± SD. Cohort 1: 1 ± 1, range 0-3 out of 63, Cohort 2: 25.7 ± 4.9, range 13-3 out of 63). For Cohort 1, auditory evoked potential was removed whereas for Cohort 2, auditory evoked potential was left intact. Spherical interpolation was applied to the remaining missing channels before low pass filter (4th total order forward-backward Butterworth filter at 50 Hz) was applied. Trials were further segmented to 500 ms before and 1000 ms after spTMS.

## Tables

Supplementary Table S1

| Starting | End |
| --- | --- |
| 15 | 45 |
| 25 | 55 |
| 35 | 65 |
| 45 | 75 |
| 55 | 85 |
| 65 | 95 |
| 75 | 105 |
| 85 | 115 |
| 95 | 125 |
| 105 | 135 |
| 115 | 145 |
| 125 | 155 |
| 135 | 165 |
| 145 | 175 |
| 155 | 185 |
| 165 | 195 |
| 175 | 205 |
| 185 | 215 |
| 195 | 225 |
| 205 | 235 |
| 215 | 245 |
| 225 | 255 |
| 235 | 265 |
| 245 | 275 |
| 255 | 285 |
| 265 | 295 |
| 275 | 305 |
| 285 | 315 |
| 295 | 325 |
| 305 | 335 |
| 315 | 345 |
| 15 | 75 |
| 76 | 300 |
| 15 | 65 |
| 65 | 120 |
| 20 | 40 |
| 55 | 70 |
| 90 | 110 |
| 160 | 200 |
| 160 | 300 |
| 100 | 131 |
| 20 | 80 |
| 80 | 140 |

Table S1 Windows used for the left motor region of LMFP to categorize the modulation of cortical excitability as facilitation or suppression. All times are shown in ms.

| coarse-graining multiscale permutation entropy complexity index, m=3 |
| --- |
| time-shifted multiscale permutation entropy complexity index, m=3 |
| composite multiscale permutation entropy complexity index, m=3 |
| approximate entropy, m=2, tau=1 |
| sample entropy, m=2, tau=1 |
| permutation entropy, m=3, tau=1 |
| distribution entropy, m=2, tau=1 |
| incremental entropy, m=2, tau=1 |
| lempel ziv complexity |
| coarse-graining multiscale permutation entropy complexity index, m=2 |
| time-shifted multiscale permutation entropy complexity index, m=2 |
| composite multiscale permutation entropy complexity index, m=2 |
| coarse-graining multiscale sample entropy complexity index, m=2 |
| time-shifted multiscale sample entropy complexity index, m=2 |
| composite multiscale sample entropy complexity index, m=2 |
| coarse-graining multiscale distribution entropy complexity index, m=2 |
| time-shifted multiscale distribution entropy complexity index, m=2 |
| composite multiscale distribution entropy complexity index, m=2 |

Table S2 List of different measures of temporal complexity tested here. m represents embedding dimension and tau represents the embedding time delay. For multiscale entropy, the embedding time delay range from 1 to 20.

| **Left Motor** – C1, C3, C5, FC1, FC3, FC5 |
| --- |
| **Central** – FC5, FC3, FC1, FC2, FC4, FC6, C5, C3, C1, C2, C4, C6, CP5, CP3, CP1, CP2, CP4, CP6 |
| **All** – Fp1, Fz, F3, F7, FC5, FC1, C3, T7, CP5, CP1, Pz, P3, P7, O1, Oz, O2, P4, P8, CP6, CP2, Cz, C4, T8, FC6, FC2, F4, F8, Fp2, AF7, AF3, F1, F5, FT7, FC3, C1, C5, TP7, CP3, P1, P5, PO7, PO3, POz, PO4, PO8, P6, P2, CPz, CP4, TP8, C6, C2, FC4, FT8, F6, AF8, AF4, F2 |

Table S3. List of ROIs and their EEG channels.

| **Model Name** | **Accuracy** | **Sensitivity** | **Specificity** | **F1** | **ROC AUC** | **PR AUC** | **Precision** |
| --- | --- | --- | --- | --- | --- | --- | --- |
| MEP Experiment 1 | | | | | | | |
| **a**  LDA CV | 0.71  [0.64, 0.79] | 0.66  [0.55, 0.77] | 0.82  [0.71, 0.93] | 0.74  [0.63, 0.84] | 0.75  [0.67, 0.81] | 0.82  [0.78, 0.87] | 0.83  [0.72, 0.95] |
| **b**  LDA CV | 0.53  [0.36, 0.69] | 0.47  [0.29, 0.66] | 0.59  [0.35, 0.76] | 0.51  [0.34, 0.68] | 0.54  [0.37, 0.74] | 0.63  [0.52, 0.80] | 0.56  [0.38, 0.74] |
| LMFP Ratios Experiment 1 | | | | | | | |
| **c**  Lasso L2 CV | 0.90  [0.85, 0.95] | 0.98  [0.95, 1.00] | 0.70  [0.56, 0.84] | 0.94  [0.91, 0.97] | 0.84  [0.76, 0.91] | 0.90  [0.86, 0.94] | 0.90  [0.86, 0.95] |
| **d**  Lasso L2 CV | 0.61  [0.50, 0.71] | 0.90  [0.75, 1.00] | 0.28  [0.17, 0.44] | 0.71  [0.61, 0.78] | 0.49  [0.39, 0.65] | 0.51  [0.48, 0.69] | 0.58  [0.52, 0.65] |

Table S4 Performance of model selection and model validation of Experiment 1. Square brackets represent 95% confidence. Row a and b represent MEP Experiment. Row c and d represent LMFP Ratios Experiment. Row a and c represent model selection step whereas row b and d represent model validation step.

| Fp1 | -0.442 |  | T8 | -0.450 |  | PO8 | 0.599 |
| --- | --- | --- | --- | --- | --- | --- | --- |
| Fz | 0.333 |  | FC6 | 0.598 |  | P6 | -0.069 |
| F3 | -0.603 |  | FC2 | 0.731 |  | P2 | 0.105 |
| F7 | 0.375 |  | F4 | 0.563 |  | CPz | -0.356 |
| FC5 | -0.078 |  | F8 | -0.463 |  | CP4 | -0.463 |
| FC1 | -0.438 |  | Fp2 | 0.285 |  | TP8 | 0.599 |
| C3 | -0.033 |  | AF7 | 0.037 |  | C6 | -0.176 |
| T7 | -0.265 |  | AF3 | -0.922 |  | C2 | 0.068 |
| CP5 | -0.998 |  | F1 | -0.290 |  | FC4 | -0.324 |
| CP1 | 0.878 |  | F5 | -0.411 |  | FT8 | -0.005 |
| Pz | -0.115 |  | FT7 | 0.326 |  | F6 | 0.026 |
| P3 | 1.0149 |  | FC3 | -0.655 |  | AF8 | 0.036 |
| P7 | -0.259 |  | C1 | -1.463 |  | AF4 | -0.264 |
| O1 | -0.023 |  | C5 | -0.989 |  | F2 | 0.564 |
| Oz | 0.236 |  | TP7 | -0.079 |  | Standard Deviation of MEP Peak-to-Peak Amplitude | -0.018 |
| O2 | 0.171 |  | CP3 | -0.942 |  | Mean MEP Peak-to-Peak Amplitude | 0.002 |
| P4 | 0.190 |  | P1 | -0.072 |  | RQS | -0.433 |
| P8 | 0.783 |  | P5 | 1.153 |  | AUC of LMFP - [15, 80] ms | 0.543 |
| CP6 | 0.204 |  | PO7 | 0.646 |  | Visit Type | -0.391 |
| CP2 | 0.684 |  | PO3 | 0.598 |  |  |  |
| Cz | -0.580 |  | POz | 0.294 |  |  |  |
| C4 | -0.267 |  | PO4 | -0.386 |  |  |  |

Table S5 Coefficients of the final LDA OA model for the MEP Experiment. Green box/text represents positive coefficients, red box/text represents negative coefficient. RQS stands for regression quality scores.

| C1 | 0.00E+00 |
| --- | --- |
| C3 | 0.00E+00 |
| C5 | 7.02E-01 |
| FC1 | 0.00E+00 |
| FC3 | 0.00E+00 |
| FC5 | 5.44E-02 |
| RQS | 2.44E-01 |
| AUC of LMFP - [15, 80] ms | 0.00E+00 |
| Visit Type | 0.00E+00 |

Table S6. Gini Importance of the final decision tree in LMFP Ratios Experiment. Higher indicates higher feature importance or contribution to the model.

1. Ozdemir RA, Boucher P, Fried PJ, Momi D, Jannati A, Pascual-Leone A, et al. Reproducibility of cortical response modulation induced by intermittent and continuous theta-burst stimulation of the human motor cortex. Brain Stimul. 2021;14:949–64.
